# Supplementary material for: Constitutive expression of ftsZ overrides the whi developmental genes to initiate sporulation of Streptomyces coelicolor
Source: PubMed Central journal article supplement — Antonie Van Leeuwenhoek. 2011 Nov 24;101(3):619–32. doi: 10.1007/s10482-011-9678-7 (PMC3278627; doi:10.1007/s10482-011-9678-7), 2011-11-24
Supplement: 10482_2011_9678_MOESM1_ESM.pdf [file 10482_2011_9678_MOESM1_ESM.pdf]

## **SUPPLEMENTAL INFORMATION**

Belonging to the manuscript:

**Constitutive expression of *ftsZ* overrides the *whi* developmental genes to initiate sporulation of *Streptomyces coelicolor***

by Joost Willemse, A. Mieke Mommaas and Gilles P. van Wezel

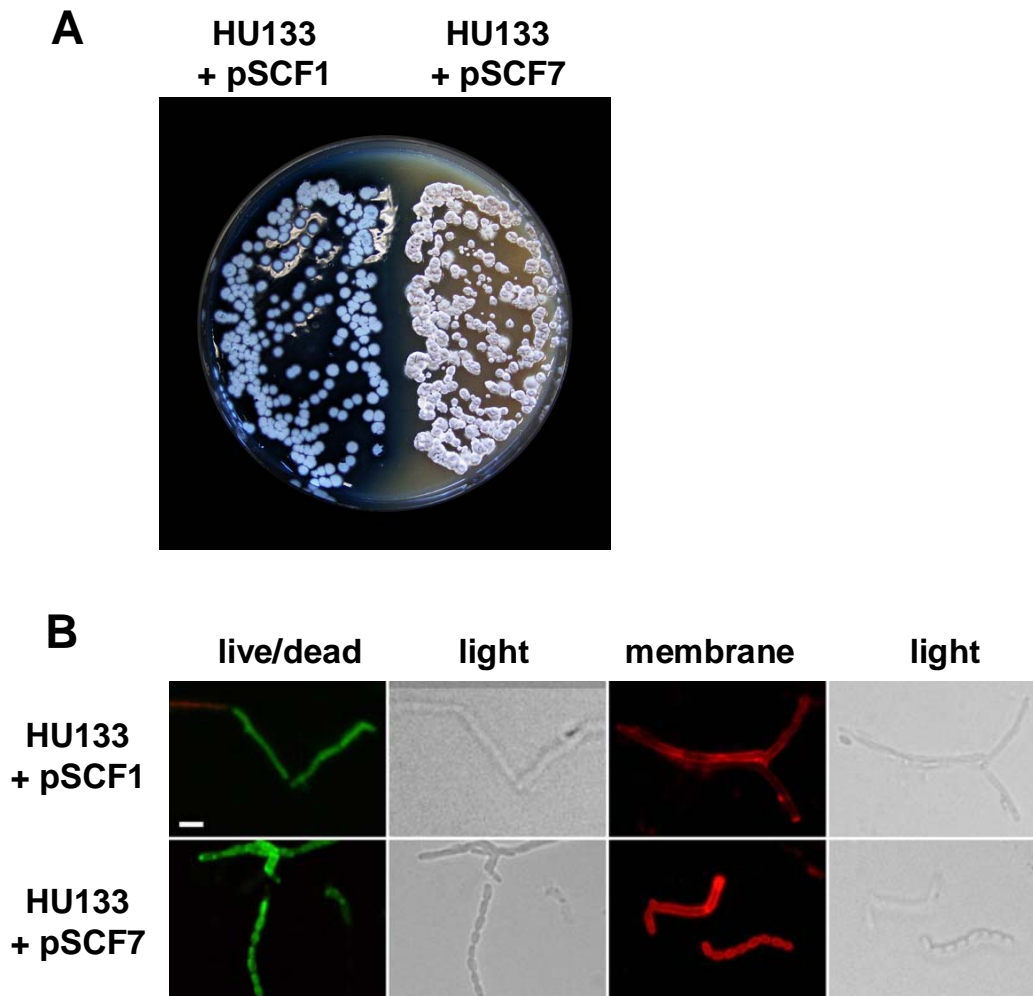

**Figure S1. Complementation of the *ftsZ* null mutant HU133 by pSCF7.**

(A) Transformants of the *ftsZ* null mutant HU133 harbouring control plasmid (left) or pSCF7 (right), with the latter expressing *ftsZ* from the constitutive *ermE* promoter. Note that grey pigmentation is restored to the *ftsZ* mutant. The *ftsZ* null mutant formed flat colonies and strongly overproduced actinorhodin; normal colony morphology and actinorhodin production were also restored by the introduction of pSCF7. The strains were grown for 6 days on SFM agar plates at 30°C.

(B) Live/dead staining (left) and septum staining (right) for the *ftsZ* null mutant harbouring control plasmid (top) or pSCF7 expressing FtsZ (bottom). Live cells were identified with syto-82 (green), dead cells with propidium iodide (red). Septa were highlighted by the membrane stain FM5-95. For all images both fluorescence and light images are presented. Bar, 2 µm.

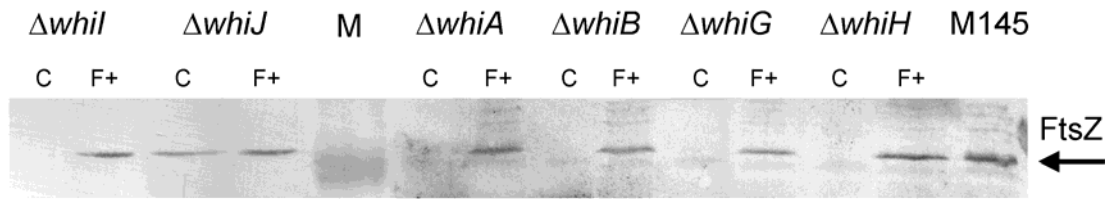

**Fig. S2. Western analysis of protein extracts obtained from liquid-grown mycelia.** Samples were *whi* mutants harbouring control plasmid (lanes labelled 'C') or plasmid pSCF7 expressing FtsZ (lanes labelled 'F'). A protein extract from *S. coelicolor* M145 is shown as the control.

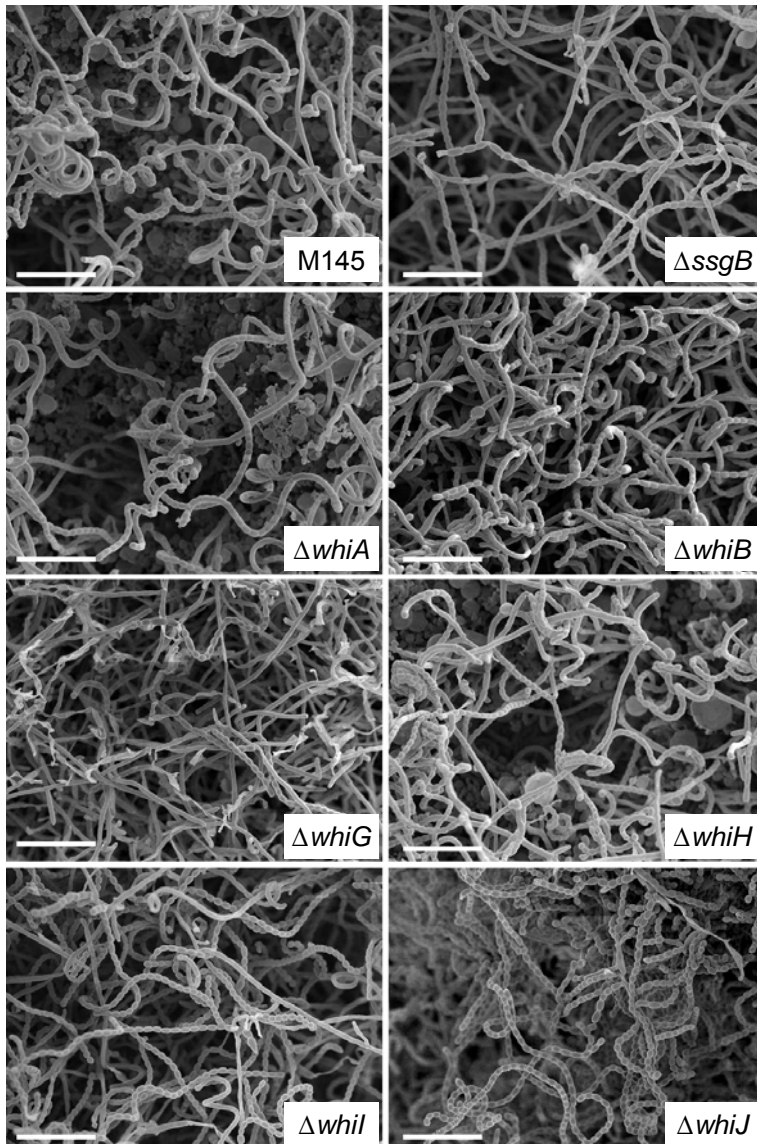

**Figure S3. Cryo-scanning electron micrographs showing overviews of sporogenic aerial hyphae of *whi* mutants harbouring pSCF7.** Strains were grown for 3 days on SFM agar plates to visualise aerial hyphae and emerging spore chains. As detailed in Fig. 3, expression of FtsZ restored sporulation to all *whi* mutants. Note that while sporulation is restored to *whiG* null mutants, aerial hyphae show lysis, and sporulation occurs with reduced frequency; the *ssgB* mutant produced occasional deformed spore-like bodies as compared, most likely as a result of the incorrect localization of FtsZ in the absence of SsgB. Note that *whiJ* transformants hypersporulated, with very long spore chains and hardly any non-sporulating aerial hyphae. For further details see Fig. 3. Bar, 10  $\mu$ m.

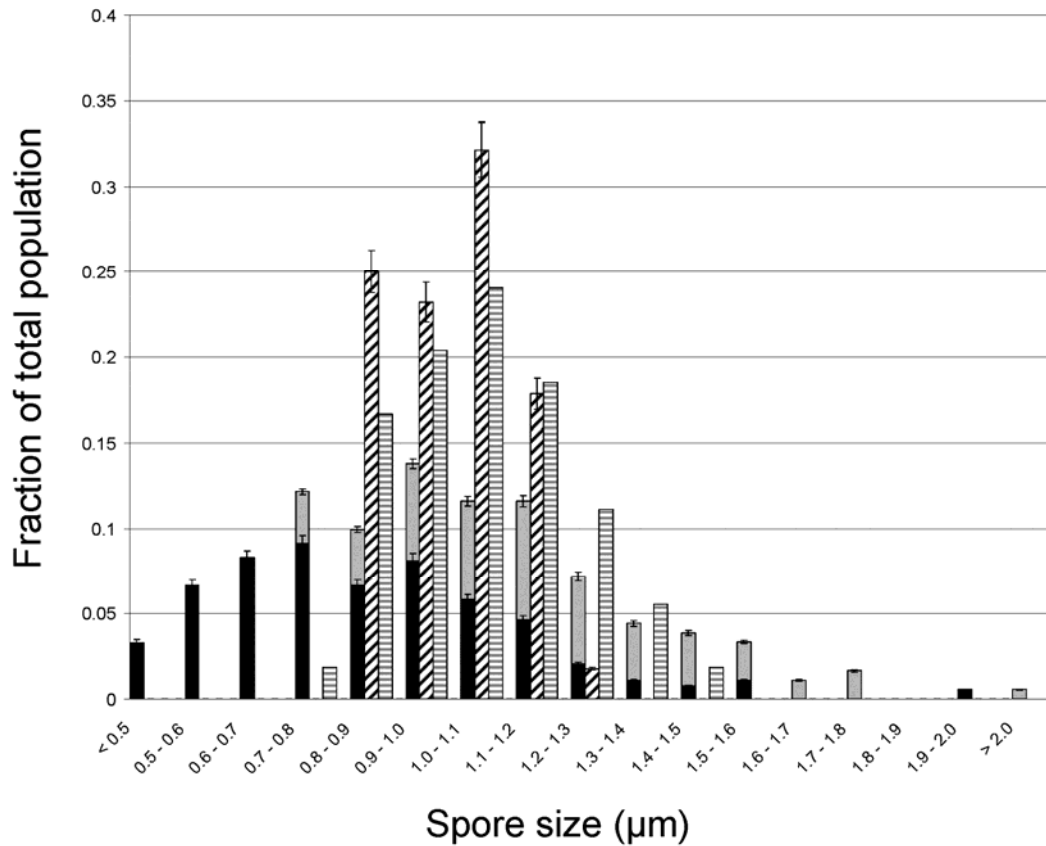

**Figure S4. Statistical analysis of spore sizes.** Bar diagrams of *S. coelicolor* M145 with control plasmid pSET152 (diagonal stripes), M145 with FtsZ expression construct pSCF7 (horizontal stripes) and the *ssgB* null mutant GSB1 harbouring pSCF7 (bar divided in black and grey shading, reflecting dead and viable spores respectively). The *ssgB* null mutant with control plasmid did not produce spores and is not included. Expression of FtsZ in the *ssgB* mutant restored some sporulation, but with a very broad distribution of spore sizes as compared to the wild-type strain. Most of the smaller sized spores in the *ssgB* mutant were nonviable (Fig. 4).

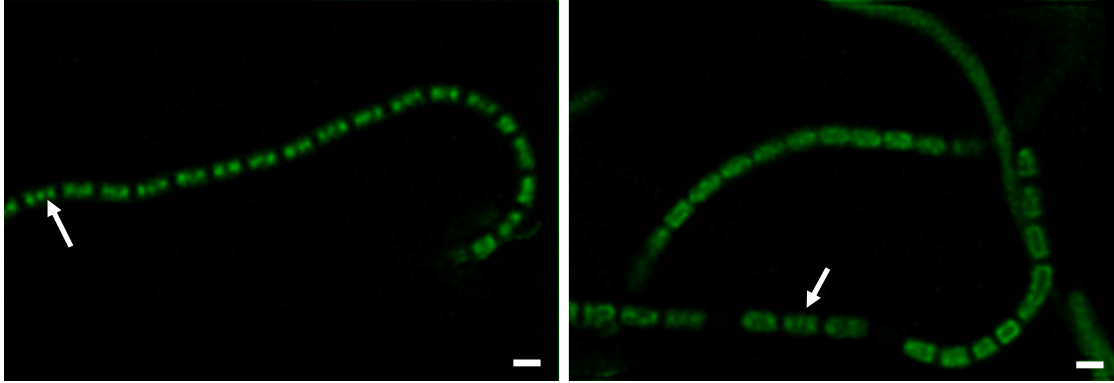

**Fig S5.** Deconvolution of fluorescence micrographs of spore chains of the *whiA* and *whiG* mutants harbouring plasmid pSCF7. **Left**,  $\Delta whiA$  + pSCF7; **right**,  $\Delta whiG$  + pSCF7. Several DNA lobes are observed in the immature spore chains in these strains, which were also observed with high-resolution TEM (see Fig. 5). In each image a typical multilobed spore is highlighted by an arrow. Bar, 1  $\mu$ m. Deconvolution was performed with Huygens Professional 3.3.2, a PSF was extracted from a z-stack of 50 nm rotavirus particles coated with eGFP. This PSF was subsequently used to optimize the fluorescent images.

**Table S1. Bacterial strains, plasmids and constructs used in this study.**

| Bacterial Strain                          | Description and/or genotype                                                                                                           | Reference                         |
|-------------------------------------------|---------------------------------------------------------------------------------------------------------------------------------------|-----------------------------------|
| <i>E. coli</i> strains                    |                                                                                                                                       |                                   |
| JM109                                     | <i>E. coli</i> K12 strain used for routine subcloning                                                                                 | (Sambrook <i>et al.</i> , 1989)   |
| ET12567                                   | <i>E. coli</i> strain (StrR TetR CamR) that produces nonmethylated DNA that can be introduced into <i>S. coelicolor</i>               | (Gust <i>et al.</i> 2004)         |
| ET12567/pUZ8002                           | ET12567 containing plasmid pUZ8002 (KanR) that allows conjugative transfer of plasmids between <i>E. coli</i> and <i>Streptomyces</i> | (Gust <i>et al.</i> 2004)         |
| <i>Derivatives of S. coelicolor</i> A3(2) |                                                                                                                                       |                                   |
| M145                                      | <i>S. coelicolor</i> A3(2) reference strain that lacks the natural plasmids SCP1 and SCP2                                             | (Kieser <i>et al.</i> 2000)       |
| FM145                                     | derivative of M145 with reduced autofluorescence                                                                                      | (Willemse and van Wezel, 2009)    |
| GSB1                                      | M145 $\Delta$ ssgB (::aacC4)                                                                                                          | (Keijser <i>et al.</i> , 2003)    |
| K202                                      | M145 + pKF41                                                                                                                          | (Grantcharova <i>et al.</i> 2005) |
| Hu133                                     | M145 <i>ftsZ::aph</i>                                                                                                                 | (McCormick <i>et al.</i> 1994)    |
| J2400                                     | M145 <i>whiG::hyg</i>                                                                                                                 | Flärdh <i>et al.</i> , 1999)      |
| J2401                                     | M145 <i>whiA::hyg</i>                                                                                                                 | Flärdh <i>et al.</i> , 1999)      |
| J2402                                     | M145 <i>whiB::hyg</i>                                                                                                                 | Flärdh <i>et al.</i> , 1999)      |
| J2403                                     | M145 <i>whiH::hyg</i>                                                                                                                 | Flärdh <i>et al.</i> , 1999)      |
| J2450                                     | M145 <i>whiI::hyg</i>                                                                                                                 | (Ainsa <i>et al.</i> 1999)        |
| J2452                                     | M145 <i>whiJ::hyg</i>                                                                                                                 | (Ainsa <i>et al.</i> 2010)        |
| JSC18                                     | J2400 + pSCF7                                                                                                                         | This study                        |
| JSC19                                     | J2401 + pSCF7                                                                                                                         | This study                        |
| JSC20                                     | J2402 + pSCF7                                                                                                                         | This study                        |
| JSC21                                     | J2403 + pSCF7                                                                                                                         | This study                        |
| JSC22                                     | J2450 + pSCF7                                                                                                                         | This study                        |
| JSC23                                     | J2452 + pSCF7                                                                                                                         | This study                        |

|                                |                                                                                                                                                     |                               |
|--------------------------------|-----------------------------------------------------------------------------------------------------------------------------------------------------|-------------------------------|
| JSC24                          | GSB1 + pSCF7B                                                                                                                                       | This study                    |
| JSC25                          | J2400 + pSCF1                                                                                                                                       | This study                    |
| JSC26                          | J2401 + pSCF1                                                                                                                                       | This study                    |
| JSC27                          | J2402 + pSCF1                                                                                                                                       | This study                    |
| JSC28                          | J2403 + pSCF1                                                                                                                                       | This study                    |
| JSC29                          | J2450 + pSCF1                                                                                                                                       | This study                    |
| JSC30                          | J2452 + pSCF1                                                                                                                                       | This study                    |
| JSC31                          | GSB1 + pSCF1                                                                                                                                        | This study                    |
| <b>Plasmids and constructs</b> | <b>Description</b>                                                                                                                                  | <b>Reference</b>              |
| pHJL401                        | <i>Streptomyces/E. coli</i> shuttle vector (1-5 copies per genome in <i>Streptomyces</i> )                                                          | (Larson and Hershberger 1986) |
| pSET152                        | <i>Streptomyces/E. coli</i> shuttle vector that integrates at the $\phi$ C31 attachment site ( <i>attP</i> ) in the <i>Streptomyces</i> genome      | (Bierman et al. 1992)         |
| pHM10a                         | <i>Streptomyces</i> integrative vector with <i>ermE</i> promoter and <i>S. ramocissimus tuf1</i> RBS. Integrates at the minicircle attachment site. | (Motamedi et al. 1995)        |
| pSCF1                          | pHJL401 containing a 2.4 kb insert harbouring <i>ftsZ</i> and <i>ftsQ</i> expressed from their natural promoters                                    | (van Wezel et al. 2000)       |
| pSCF5                          | pHJL401 containing a 1.6 kb insert harbouring <i>ftsZ</i> expressed from its natural promoter                                                       | (van Wezel et al. 2000)       |
| pSCF7                          | Integrative construct based on pSET152 expressing <i>S. coelicolor ftsZ</i> from the constitutive <i>ermE</i> promoter                              | (van Wezel et al. 2000)       |
| pSCF7B                         | Derivative of pHM10a carrying the insert of pSCF7 and the <i>hyg</i> resistance cassette                                                            | this study                    |



## References

- Ainsa JA, Bird N, Ryding NJ, Findlay KC, Chater KF (2010) The complex *whiJ* locus mediates environmentally sensitive repression of development of *Streptomyces coelicolor* A3(2). *Antonie Van Leeuwenhoek* 98: 225-236.
- Ainsa JA, Parry HD, Chater KF (1999) A response regulator-like protein that functions at an intermediate stage of sporulation in *Streptomyces coelicolor* A3(2). *Mol Microbiol* 34: 607-619.
- Bierman M, Logan R, O'Brien K, Seno ET, Rao RN, Schonert BE (1992) Plasmid cloning vectors for the conjugal transfer of DNA from *Escherichia coli* to *Streptomyces* spp. *Gene* 116: 43-49.
- Grantcharova N, Lustig U, Flärdh K (2005) Dynamics of FtsZ assembly during sporulation in *Streptomyces coelicolor* A3(2). *J Bacteriol* 187: 3227-3237.
- Gust B, Chandra G, Jakimowicz D, Yuqing T, Bruton CJ, Chater KF (2004) Lambda red-mediated genetic manipulation of antibiotic-producing *Streptomyces*. *Adv Appl Microbiol* 54: 107-128.
- Kieser T, Bibb MJ, Buttner MJ, Chater KF, Hopwood DA (2000) *Practical Streptomyces genetics*. The John Innes Foundation, Norwich, United Kingdom.
- Larson JL, Hershberger CL (1986) The minimal replicon of a streptomycete plasmid produces an ultrahigh level of plasmid DNA. *Plasmid* 15: 199-209.
- McCormick JR, Su EP, Driks A, Losick R (1994) Growth and viability of *Streptomyces coelicolor* mutant for the cell division gene *ftsZ*. *Mol Microbiol* 14: 243-254.
- Motamedi H, Shafiee A, Cai SJ (1995) Integrative vectors for heterologous gene expression in *Streptomyces* spp. *Gene* 160: 25-31.
- van Wezel GP, van der Meulen J, Taal E, Koerten H, Kraal B (2000) Effects of increased and deregulated expression of cell division genes on the morphology and on antibiotic production of streptomycetes. *Antonie Van Leeuwenhoek* 78: 269-276.
